# Supplementary material for: Elevated LINC00894 relieves the oncogenic properties of thyroid cancer cell by sponging let-7e-5p to promote TIA-1 expression
Source: Springer Nature journal article supplement (doi:10.1007/s12672-022-00520-2), 2022-07-01

**Figure 4F**

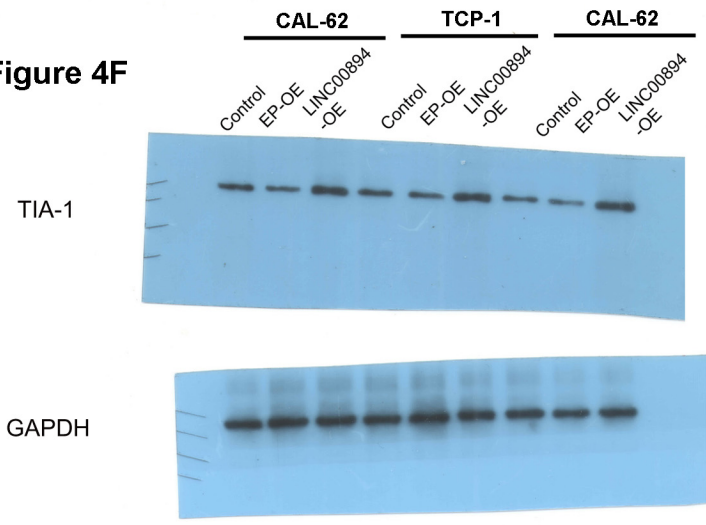

**Figure 5C**

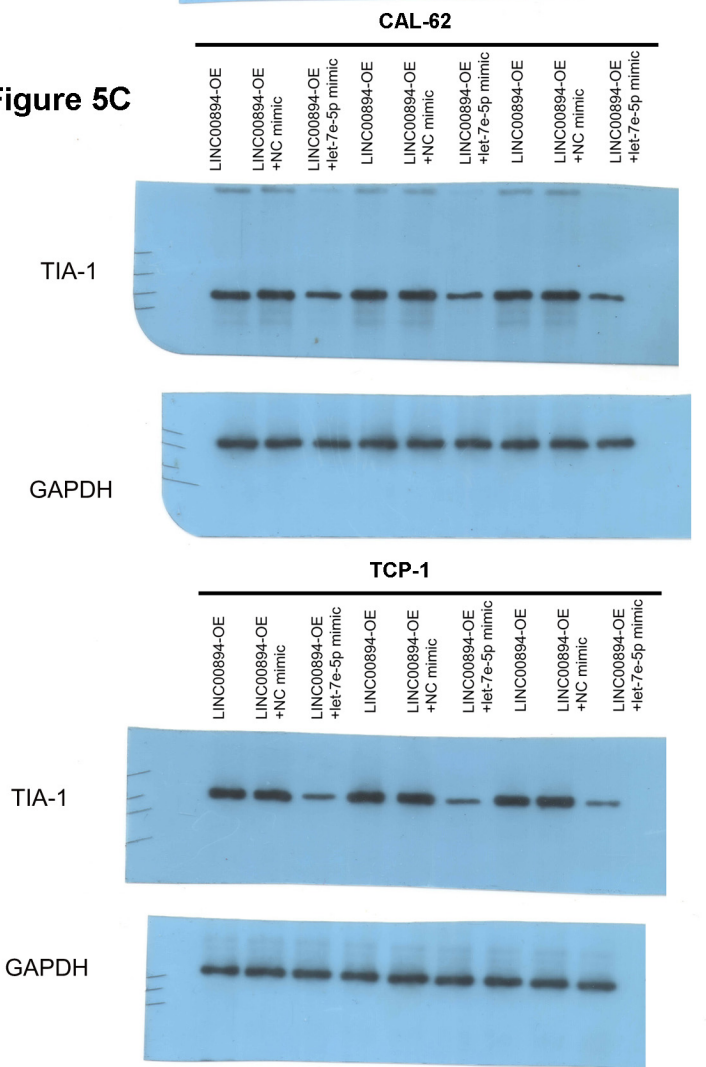

Supplement: MOESM1 [file 25645996]
